# Supplementary material for: Downregulation of deubiquitinating enzyme USP25 promotes the development of allergic rhinitis by enhancing TSLP signaling in the nasal epithelium
Source: PubMed Central journal article supplement — Mol Med Rep. 2022 Sep 28;26(5):347. doi: 10.3892/mmr.2022.12863 (PMC9551407; doi:10.3892/mmr.2022.12863), 2022-09-28

Figure S1. Successful transfection of HNEpCs with siRNAs or overexpression plasmids. (A) Protein expression levels of USP25 were assessed using western blotting. (B) Protein expression levels of TRAF3 were assessed using western blotting. (C) Protein expression levels of USP25 were assessed using western blotting. (D) Protein expression levels of TRAF3 were assessed using western blotting. (E) Semi-quantitative analysis of band intensity. Data are presented as the mean  $\pm$  standard deviation (n=3). Each experiment was repeated three times. Statistical analysis was performed using independent Student's t test. \*P<0.05. USP25, ubiquitin-specific peptidase 25; TRAF3, TNF receptor-associated factor 3; si, small interfering; NC, negative control.

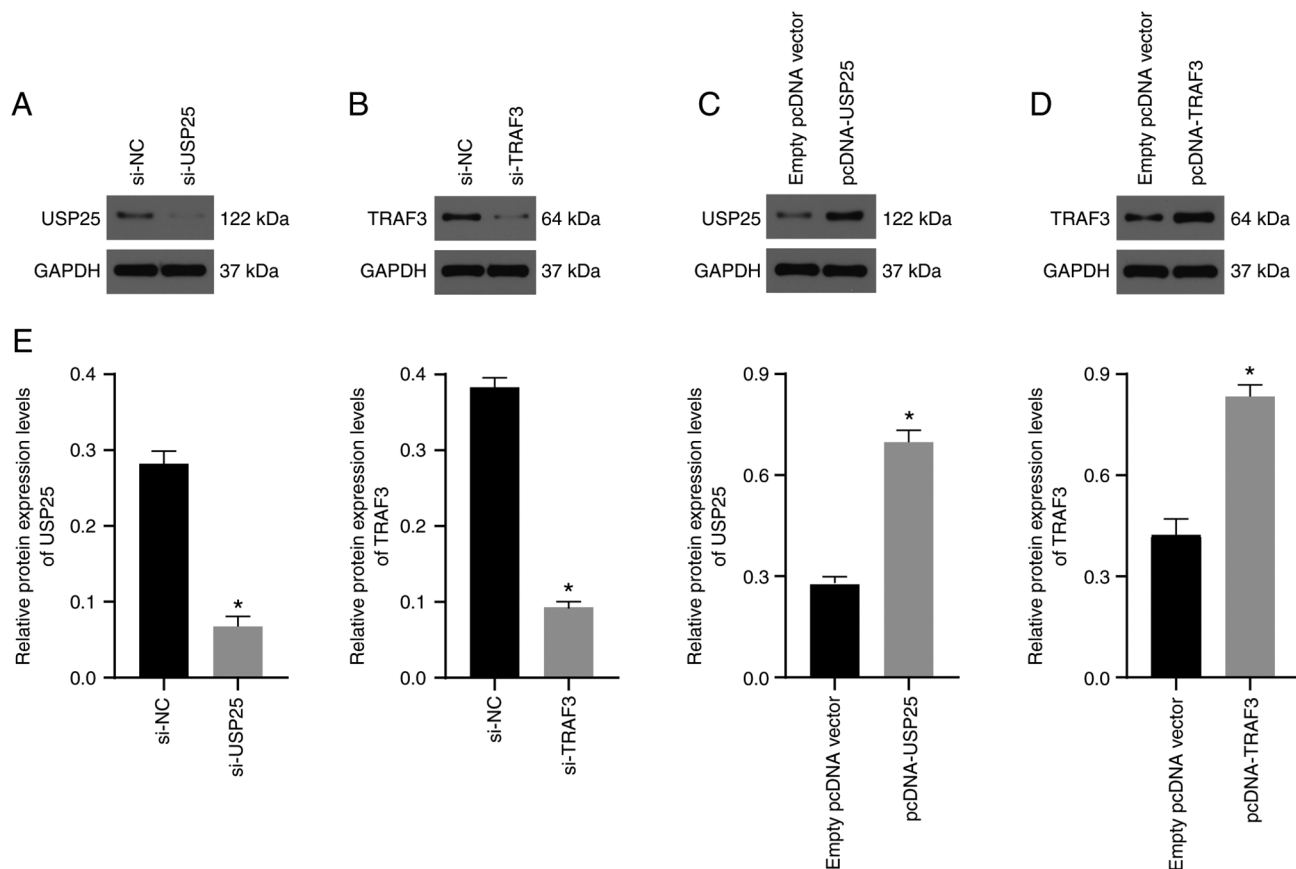

Supplement: Supplementary_Data1.pdf [file Supplementary_Data1.pdf]
