# Supplementary material for: Downregulation of deubiquitinating enzyme USP25 promotes the development of allergic rhinitis by enhancing TSLP signaling in the nasal epithelium
Source: PubMed Central journal article supplement — Mol Med Rep. 2022 Sep 28;26(5):347. doi: 10.3892/mmr.2022.12863 (PMC9551407; doi:10.3892/mmr.2022.12863), 2022-09-28
Supplement: Supplementary_Data2.pdf [file Supplementary_Data2.pdf]

Table SI. Demographic features of patients with AR and healthy subjects.

| Characteristic            | Healthy (n=15.00) | AR (n=25.00) | P-value             |
|---------------------------|-------------------|--------------|---------------------|
| Age, years                | 34.52±14.72       | 36.26±12.53  | 0.574 <sup>a</sup>  |
| Sex                       |                   |              |                     |
| Female                    | 7.00              | 11.00        | 0.702 <sup>b</sup>  |
| Male                      | 8.00              | 14.00        |                     |
| SPT, positive             | 0.00              | 25.00        | <0.001 <sup>a</sup> |
| sIgE concentration, IU/ml |                   |              |                     |
| Der p/Der f               | <0.35             | 36.86±8.12   | <0.001 <sup>a</sup> |
| House dust                | <0.35             | <0.35        | -                   |
| Trees                     | <0.35             | <0.35        | -                   |
| Artemisia/ragweed         | <0.35             | <0.35        | -                   |
| Molds                     | <0.35             | <0.35        | -                   |
| Hair or dander of pets    | <0.35             | <0.35        | -                   |

Statistical analysis was performed using <sup>a</sup>Student's t and <sup>b</sup> $\chi^2$  test. -, not analyzed; AR, allergic rhinitis; Der p, *Dermatophagoides pteronyssinus*; Der f, *Dermatophagoides farina*; SPT, skin prick test; sIgE, specific immunoglobulin E.

Table SII. VAS score of the nasal symptoms of patients with AR and healthy subjects.

| Symptom           | Healthy (n=15) | AR (n=25) | P-value |
|-------------------|----------------|-----------|---------|
| Nasal obstruction | 0±0            | 7.11±0.38 | <0.001  |
| Rhinorrhea        | 0±0            | 6.32±1.54 | <0.001  |
| Nasal itching     | 0±0            | 4.71±1.63 | <0.001  |
| Sneezing          | 0±0            | 7.23±0.53 | <0.001  |

Statistical analysis was performed using independent Student's t test. AR, allergic rhinitis; VAS, visual analog scale.
